# Supplementary material for: Comparison of CO 2 and O 2 fluxes demonstrate retention of respired CO 2 in tree stems from a range of tree species
Source: Copernicus journal article supplement (doi:10.5194/bg-2018-256), 2018-06-25
Supplement: Supplementary file 2 [file Supplement.xlsx]

## Sheet: Jerusalem seasons
	Time of sampling instantanuos	ARQ instantanuos	SD ARQ instantanuos	Time of sampling steady state	ARQ steady state	SD ARQ steady state	Phenology Code (0-full foliage, 1- defoliation, 2- winter dormancy, 3- leaf regenration)
Pistacia atlantica	2012-02-05 15:54:00	0.442783	0.00694331	2012-02-09 10:12:00	0.752831	0.0151348	2
Pistacia atlantica	2012-04-05 11:56:00	0.507419	0.00231278	2012-04-08 10:46:00	0.467926	0.00439137	3
Pistacia atlantica	2012-07-03 12:01:00	0.871723		2012-07-03 12:01:00			0
Pistacia atlantica	2012-07-04 04:05:00	0.861584		2012-07-04 04:05:00			0
Pistacia atlantica	2012-07-04 10:02:00	0.884696		2012-07-04 10:02:00			0
Pistacia atlantica	2012-07-05 17:29:00	0.829799	0.0171584	2012-07-08 12:44:00	0.693108	0.0106916	0
Pistacia atlantica	2012-11-25 13:55:00	0.616313	0.0120544	2012-11-27 15:10:00	0.775637	0.00133314	0
Pistacia atlantica	2013-02-05 15:19:00	0.78209	0.020918	2013-02-07 12:40:00	0.722771	0.00335909	2
Pistacia atlantica	2013-03-24 12:05:00	0.543598	0.0112456	2013-03-27 09:54:00	0.533174	0.00890391	3
Pistacia atlantica	2013-04-11 18:26:00	0.730326					3
Pistacia atlantica	2013-04-12 03:44:00	1.04647					3
Pistacia atlantica	2013-04-12 07:45:00	0.772261	0.0182171	2013-04-14 11:25:00	0.61505	0.00795806	3
Pistacia atlantica	2013-07-01 14:10:00	0.583519	0.0206882	2013-07-03 16:13:00	0.504937	0.0742576	0
Pistacia atlantica	2013-10-23 12:27:00	0.835196	0.0076992	2013-10-25 12:51:00	0.772333	0.00493185	1
Pistacia atlantica	2013-12-21 11:33:00	0.752204	0.00302274	2013-12-23 13:00:00	0.704303	0.0165723	2
Pistacia atlantica	2014-03-20 08:59:00	0.570554	0.00903435	2014-03-22 10:00:00	0.632787	0.00791295	3
Pistacia atlantica	2014-04-10 11:16:00	0.649892	0.0241229	2014-04-12 11:06:00	0.556283	0.000774217	3
Pistacia atlantica	2014-07-09 13:02:00	0.567775	0.105819	2014-07-11 12:20:00	0.583892	0.00472053	0
Malus domestica				2010-04-21 10:00:00			0
Malus domestica				2010-12-20 10:00:00			0
Malus domestica				2010-12-21 10:00:00			0
Malus domestica				2011-01-12 10:00:00			0
Malus domestica				2011-07-31 10:00:00	0.639599	0	0
Malus domestica				2011-08-11 10:00:00	0.599973	0	0
Malus domestica	2011-09-15 13:24:00						0
Malus domestica				2011-09-15 18:20:00	0.541988	0.00887336	0
Malus domestica				2011-09-16 08:30:00	0.693845	0.0228548	0
Malus domestica				2011-09-18 10:00:00	0.67784	0.0117354	0
Malus domestica	2011-09-18 14:15:00	0.726848	0	2011-09-20 11:07:00	0.676778	0.0126181	0
Malus domestica	2011-09-22 14:18:00	0.73137	0.0215418				0
Malus domestica	2011-11-01 16:28:00	0.755255	0.0263763	2011-11-03 14:28:00	0.771203	0.00511346	0
Malus domestica	2011-12-08 12:27:00	0.866876	0.0225498	2011-12-11 10:05:00	0.91906	0.0141477	1
Malus domestica				2011-12-22 09:49:00	0.858914	0.0276966	2
Malus domestica				2011-12-22 12:40:00	0.876214	0.0426285	2
Malus domestica				2012-01-05 11:49:00	0.994048	0.00434457	2
Malus domestica	2012-02-07 12:19:00	0.774998	0.0081685	2012-02-09 10:41:00	0.854189	0.0187239	2
Malus domestica	2012-03-20 12:16:00	1.00913	0.0474266	2012-03-25 12:00:00	0.806449	0.0309649	2
Malus domestica	2012-04-05 14:54:00	0.791677	0.188604	2012-04-19 11:29:00	0.825987	0.0673426	3
Malus domestica	2012-04-29 11:51:00	0.751743	0.0552028	2012-05-01 12:00:00	0.795746	0.00646395	0
Malus domestica				2012-05-23 14:22:00	0.75356	0.0142716	0
Malus domestica				2012-05-31 15:00:00	0.734773	0.020955	0
Malus domestica	2012-06-24 13:44:00			2012-06-26 10:20:00	0.755276	0.0833832	0
Malus domestica	2012-07-04 05:15:00	0.828416	0.0308748				0
Malus domestica	2012-07-04 11:05:00	0.886242	0.0169736				0
Malus domestica	2012-07-05 18:02:00	0.770391	0.0750494	2012-07-08 12:53:00	0.74262	0.0208829	0
Malus domestica				2012-07-29 09:50:00	0.788862	0.00484539	0
Malus domestica				2012-07-29 13:40:00	0.770451	0.0275538	0
Malus domestica				2012-07-29 17:30:00	0.782193	0.00910251	0
Malus domestica	2012-07-30 15:41:00	0.86684	0.10306	2012-08-01 11:45:00	0.802173	0.00109251	0
Malus domestica				2012-08-08 10:00:00	0.67025	0.0098033	0
Malus domestica	2012-08-08 18:10:00	0.826194	0.0289795				0
Malus domestica	2012-08-09 04:35:00	0.902217	0				0
Malus domestica	2012-08-09 10:39:00	0.747896	0.0797793	2012-08-12 11:09:00	0.79		0
Malus domestica	2012-09-19 15:49:00	0.741217	0.0686942	2012-09-23 10:50:00	0.700485	0.00570593	0
Malus domestica				2012-10-18 09:00:00	0.668595	0.0373989	0
Malus domestica	2012-10-23 13:47:00	0.751326	0.0415775	2012-10-25 10:28:00	0.735371	0.0100762	1
Malus domestica	2012-11-14 13:50:00	0.741043	0	2012-11-18 10:37:00	0.759726	0	1
Malus domestica	2012-11-22 15:05:00	0.784031	0.0263568	2012-11-25 15:08:00	0.738607	0.00453019	1
Malus domestica	2013-02-10 16:20:00	0.699485	0.00703307	2013-02-12 11:50:00	0.73711	0.00302462	2
Malus domestica	2013-03-11 17:00:00	0.713034	0.00513853	2013-03-14 09:20:00	0.762179	0.0188062	2
Malus domestica	2013-03-24 14:05:00	0.578575	0.077066	2013-03-27 10:48:00	0.751525	0.0317781	3
Malus domestica	2013-04-09 15:30:00	0.728719	0	2013-04-11 17:10:00	0.731669	0.00126125	3
Malus domestica	2013-04-11 19:15:00	0.837688	0.0191975				3
Malus domestica	2013-04-12 04:57:00	0.799957	0.0481152				3
Malus domestica	2013-04-12 11:30:00	0.823794	0.0291944				3
Malus domestica	2013-05-06 15:00:00	0.759842	0.142596	2013-05-08 12:36:00	0.7355	0.0137489	0
Malus domestica	2013-05-12 16:20:00	0.63345	0.0863705	2013-05-13 13:29:00	0.704886	0.0144967	0
Malus domestica	2013-05-24 12:24:00	0.872633	0.0576278	2013-05-26 11:59:00	0.729891	0.00444532	0
Malus domestica	2013-07-01 14:13:00	0.532744	0.0121404	2013-07-03 15:30:00	0.594551	0.0492489	0
Populus deltoides				2011-12-26 09:22:00	0.591318	0.00230393	2
Populus deltoides				2012-01-05 10:40:00	0.719928	0.0051938	2
Populus deltoides	2012-04-05 11:43:00	0.471717	0.184786	2012-04-08 10:30:00	0.836977	0.00835577	3
Populus deltoides	2012-07-03 11:47:00	0.834847	0.0206788				0
Populus deltoides	2012-07-04 03:55:00	0.75575	0.00909227				0
Populus deltoides	2012-07-04 09:52:00	0.814478	0.00507374				0
Populus deltoides	2012-07-05 17:18:00	0.729831	0.0106847	2012-07-08 12:34:00	0.775005	0.00558841	0
Populus deltoides	2012-11-25 14:45:00	0.706711	0.0144853	2012-11-27 15:30:00	0.829139	0.0555462	0
Populus deltoides	2013-02-05 14:05:00	0.722338	0.0105988	2013-02-07 13:02:00	0.766264	0.00705871	2
Populus deltoides	2013-03-24 11:58:00	0.588138	0.0810061	2013-03-27 09:15:00	0.777916	0.0100017	3
Populus deltoides	2013-04-11 18:09:00	1.03043	0.0254079				0
Populus deltoides	2013-04-12 03:53:00	0.991266	0.0363082				0
Populus deltoides	2013-04-12 07:55:00	0.950055	0.00120644	2013-04-14 11:14:00	0.992169	0.00301969	0
Populus deltoides	2013-07-01 13:58:00	0.452591	0.310452	2013-07-03 16:30:00	0.594551	0.00437611	0
Populus deltoides	2013-10-23 11:43:00	0.873285		2013-10-25 12:31:00	0.741056	0	1
Populus deltoides	2013-12-21 11:19:00	0.42329	0.00401105	2013-12-23 12:40:00	0.702725	0.0148424	2
Populus deltoides	2014-03-20 09:18:00	0.489553		2014-03-22 10:14:00	0.742223	0.000402375	3
Populus deltoides	2014-04-10 11:03:00	0.616732	0.00536696	2014-04-12 11:05:00	0.948653	0.00843665	3
Populus deltoides	2014-07-09 12:15:00	0.599181	0.0299555	2014-07-11 12:10:00	0.702128	0.0117959	0
Platanus occidentalis High chamber	2011-12-04 11:41:00	1.12326	0	2011-12-06 11:51:00	0.897803	0.00262112	1
Platanus occidentalis High chamber	2012-01-05 11:15:00	0.918223	0.010646	2012-01-08 09:53:00			2
Platanus occidentalis High chamber	2012-02-05 16:35:00	0.470911	0.0205742	2012-02-09 10:00:00		0.0112035	2
Platanus occidentalis High chamber	2012-04-05 11:36:00	0.582056	0.0731412	2012-04-08 10:33:00			3
Platanus occidentalis High chamber	2012-07-03 11:42:00	0.896527	0.0784803				0
Platanus occidentalis High chamber	2012-07-04 03:58:00	0.820404	0.00158364				0
Platanus occidentalis High chamber	2012-07-04 09:49:00	0.809781	0.0478477				0
Platanus occidentalis High chamber	2012-09-19 12:32:00	1.04976	0.0180149	2012-09-23 10:14:00	0.745066	0.00891621	0
Platanus occidentalis High chamber	2012-11-15 10:40:00	0.952836	0.00360228	2012-11-18 12:40:00	0.890984	0	1
Platanus occidentalis High chamber	2013-02-05 14:21:00	1.03108	0.0342325	2013-02-07 13:06:00	0.720198	0.00494106	2
Platanus occidentalis High chamber	2013-03-24 12:19:00	0.640896	0.0681054	2013-03-27 09:21:00	0.631913	0.0120817	3
Platanus occidentalis High chamber	2013-04-11 18:13:00	1.05304	0.061127				3
Platanus occidentalis High chamber	2013-04-12 03:55:00	0.848955	0.0545298				3
Platanus occidentalis High chamber	2013-04-12 07:58:00	0.983046	0.00201328				3
Platanus occidentalis High chamber	2013-04-23 10:47:00	0.890687	0.0127676	2013-04-25 10:51:00	0.858352	0.00224743	0
Platanus occidentalis High chamber				2013-07-03 16:35:00	0.71015	0	0
Platanus occidentalis High chamber	2013-10-23 11:30:00	0.452357	Inf	2013-10-25 12:15:00	0.561875	6.94756e-05	1
Platanus occidentalis High chamber	2013-12-21 11:12:00	0.377389	0.00623319	2013-12-23 12:30:00	0.730532	0.0039468	2
Platanus occidentalis High chamber	2014-03-20 09:11:00	0.418603	0.0118871	2014-03-22 10:10:00	0.665286	0.00440368	3
Platanus occidentalis High chamber	2014-04-10 10:55:00	0.535564	0	2014-04-12 11:00:00	0.76313	0	3
Platanus occidentalis High chamber	2014-07-09 12:07:00	0.695404	1.88871	2014-07-11 12:00:00	0.740476	0.0324439	0
Platanus occidentalis Low	2011-12-04 11:41:00	1.05394	0.0174467	2011-12-06 11:51:00	0.876129	0.0174467	1
Platanus occidentalis Low	2012-01-05 11:16:00	0.730457	0.0749008	2012-01-08 09:55:00	0.68621	0.0749008	2
Platanus occidentalis Low	2012-02-05 16:39:00	0.574867	0.0191124	2012-02-09 10:02:00	0.631154	0.0191124	2
Platanus occidentalis Low	2012-04-05 11:37:00	0.663202	0.0465565	2012-04-08 10:35:00	0.854824	0.0465565	3
Platanus occidentalis Low	2012-09-19 12:28:00	0.931194	0.0225055	2012-09-23 10:12:00	0.637697	0.0225055	0
Platanus occidentalis Low	2012-11-15 10:42:00	0.897329	0.00552221	2012-11-18 12:48:00	0.843042	0.00552221	1
Platanus occidentalis Low	2013-02-05 14:14:00	0.679207	0.0018794	2013-02-07 13:08:00	0.581954	0.0018794	2
Platanus occidentalis Low	2013-03-24 12:22:00	0.63594	0.000940642	2013-03-27 09:27:00	0.688269	0.000940642	3
Platanus occidentalis Low	2013-04-11 18:14:00						3
Platanus occidentalis Low	2013-04-12 03:57:00						3
Platanus occidentalis Low	2013-04-12 07:59:00						3
Platanus occidentalis Low	2013-04-23 10:51:00	0.878472	0.0370848	2013-04-25 10:55:00	0.68575	0.0370848	0
Platanus occidentalis Low	2013-07-01 13:25:00	0.65807	0.146139	2013-07-03 16:40:00	0.545129	0.146139	0
Platanus occidentalis Low	2013-10-23 11:35:00		0.00485213	2013-10-25 12:17:00	0.566382	0.00485213	1
Platanus occidentalis Low	2013-12-21 11:16:00	0.532744	0.000467941	2013-12-23 12:33:00	0.681134	0.000467941	2
Platanus occidentalis Low	2014-03-20 09:15:00	0.594765	0.00420213	2014-03-22 10:11:00	0.544409	0.00420213	3
Platanus occidentalis Low	2014-04-10 10:58:00	0.705396	0.00153714	2014-04-12 11:03:00	0.576689	0.00153714	3
Platanus occidentalis Low	2014-07-09 12:12:00	0.978119	0.129893	2014-07-11 12:03:00	0.484566	0.129893	0
Quercus calliprinos High	2011-12-28 10:28:00	0.410537	0	2011-12-28 10:28:00	0.705294	0
Quercus calliprinos High			0.0880521	2012-01-05 11:43:00	0.707864	0.0880521
Quercus calliprinos High	2012-02-07 10:35:00	0.53161	0.00270165	2012-02-09 10:25:00	0.694452	0.00270165
Quercus calliprinos High	2012-04-05 12:44:00	0.464541	0.00959073	2012-04-08 11:00:00	0.504028	0.00959073
Quercus calliprinos High	2012-08-08 17:55:00	0.681659
Quercus calliprinos High	2012-08-09 04:41:00	0.888447
Quercus calliprinos High	2012-08-09 10:50:00	0.767018	0.0020652	2012-08-12 11:02:00	0.691941	0.0020652
Quercus calliprinos High	2012-11-14 12:33:00	0.709559	0.020531	2012-11-18 10:48:00	0.807478	0.020531
Quercus calliprinos High	2013-02-07 12:27:00	0.632891	0	2013-02-10 15:25:00	0.475343	0
Quercus calliprinos High	2013-02-20 12:12:00	0.688669	0.0164818	2013-02-24 10:01:00	0.669135	0.0164818
Quercus calliprinos High	2013-03-24 13:53:00	0.528211	0.00232222	2013-03-27 10:33:00	0.371413	0.00232222
Quercus calliprinos High	2013-04-11 18:34:00	0.522204
Quercus calliprinos High	2013-04-12 04:11:00	0.751638
Quercus calliprinos High	2013-04-12 09:19:00	0.732392	0.000288792	2013-04-14 10:53:00	0.47795	0.000288792
Quercus calliprinos High	2013-07-01 15:05:00	0.373863	0.0128978	2013-07-03 15:47:00	0.45214	0.0128978
Quercus calliprinos High	2013-12-21 12:20:00	0.54678	0.000721037	2013-12-23 13:15:00	0.566736	0.000721037
Quercus calliprinos High	2014-03-20 10:11:00	0.215547	0.00136654	2014-03-22 10:30:00	0.406615	0.00136654
Quercus calliprinos High	2014-04-10 11:57:00	0.373157	0	2014-04-12 11:50:00	0.442508	0
Quercus calliprinos High	2014-07-09 13:53:00	0.551787	0.0101835	2014-07-11 12:28:00	0.595141	0.0101835
Quercus calliprinos Low		0.53046	0.0215532	2012-01-05 11:34:00	0.833546	0.0336418
Quercus calliprinos Low	2012-02-07 10:31:00	0.457488	0.0107492	2012-02-09 10:22:00	0.66511	0.0215532
Quercus calliprinos Low	2012-04-05 12:44:00	0.645818		2012-04-08 11:00:00	0.498266	0.0107492
Quercus calliprinos Low	2012-08-08 17:51:00	0.639095
Quercus calliprinos Low	2012-08-09 04:39:00	0.555416	0.00112758
Quercus calliprinos Low	2012-08-09 10:46:00	0.714712	0	2012-08-12 11:00:00	0.617654	0.00112758
Quercus calliprinos Low	2012-11-14 12:27:00	0.729062	0.0094336	2012-11-18 10:45:00	0.556736	0
Quercus calliprinos Low	2012-11-25 12:52:00	0.809863	0.0033807	2012-11-27 14:48:00	0.65262	0.0094336
Quercus calliprinos Low	2013-02-07 11:45:00	0.734027	0.00466563	2013-02-10 15:17:00	0.597958	0.0033807
Quercus calliprinos Low	2013-02-20 12:08:00	0.560424	0.00080109	2013-02-24 09:52:00	0.62706	0.00466563
Quercus calliprinos Low	2013-03-24 13:48:00	0.615743		2013-03-27 10:20:00	0.504555	0.00080109
Quercus calliprinos Low	2013-04-11 18:33:00	0.693666
Quercus calliprinos Low	2013-04-12 04:10:00	0.644195	0.00362272
Quercus calliprinos Low	2013-04-12 09:16:00	0.521764	0.000193802	2013-04-14 10:50:00	0.524335	0.00362272
Quercus calliprinos Low	2013-07-01 15:06:00	0.443282	0.00753206	2013-07-03 15:50:00	0.469164	0.000193802
Quercus calliprinos Low	2013-12-21 12:16:00		0	2013-12-23 13:13:00	0.540361	0.00753206
Quercus calliprinos Low	2014-03-20 10:08:00	0.572476	0	2014-03-22 10:31:00	0.58332	0
Quercus calliprinos Low	2014-04-10 11:59:00		0.00408373	2014-04-12 11:52:00	0.636311	0
Quercus calliprinos Low		0.608442	0.0095855	2014-04-24 10:12:00	0.420564	0.00408373
Quercus calliprinos Low	2014-07-09 13:50:00			2014-07-11 12:31:00	0.648281	0.0095855

## Sheet: jerusalem Q. ilex
Chamber						O2 uptake rate incubations								ARQ incubations
Tree ID	diameter in the lower part of the chamber	Height from the lower part of the chamber to the ground	influx (umole O2* m^-2*s^-1)	ARQ short	ARQ 3 d	outer bark1 nanomole O2 gFW^-1 s^-1	outer bark2 nanomole O2 gFW^-1 s^-1	outer bark3 nanomole O2 gFW^-1 s^-1	outer bark4 nanomole O2 gFW^-1 s^-1	Leaves1 nanomole O2 gFW^-1 s^-1	Leaves2 nanomole O2 gFW^-1 s^-1	Leaves3 nanomole O2 gFW^-1 s^-1	Leaves4 nanomole O2 gFW^-1 s^-1	outer bark1	outer bark2	outer bark3	outer bark4	leaves1	leaves2	leaves3	leaves4	water cont stem cores (fraction)	water cont leaves (fraction)
I.J.1	22.9183	122	7.32242	0.652837	0.610973	2.74392	1.45387	1.37179	1.72424	3.31806	3.11866	2.52911	2.27547	0.357757	0.637792	0.875927	0.922986	0.832627	0.903245	0.88953	0.900298	0.306624	0.441489
I.J.2	29.2845	130	3.48448	0.525858	0.351012	2.06868	1.1267	1.34944	1.83806	2.66526	2.58291	1.96443	1.75725	0.451877	0.755677	0.909135	0.915481	0.795918	0.893731	0.921767	0.922098	0.418699	0.447747
I.J.3	15.7563	121	1.54347	0.409004	0.342945	1.95596	1.09319	1.32797	1.83237	2.89888	2.52862	1.93451	1.71428	0.397609	0.662596	0.907884	0.937603	0.778059	0.885197	0.894989	0.905403	0.463325	0.502146
I.J.4	12.4141	138	1.36339	0.143347	0.398068	2.10388	1.52764	1.85693	2.73401	2.97346	1.91618	2.34581	2.10686	0.539153	0.850665	0.94628	0.981762	0.809509	0.881058	0.929721	0.934412	0.500657	0.429737

## Sheet: Ramat Hanadiv
	ARQ			WP (Mpa)
Tree ID	2012-04-01	2012-09-01	2013-01-01	2012-04-01	2012-09-01	2013-01-01
1	0.729138	0.718705	0.745425	0.689476	2.82685	0.758423
2	0.767591	0.747904	0.639346	0.620528	2.7579	0.930792
8	0.602907	0.672993	0.809008	0.655002	2.62001	0.965266
9	0.653624	0.549297	0.618412	0.586055	2.37869	0.792897

## Sheet: US sites
Site	Tree ID	ARQ	SD ARQ	[O2] (%)
Bartlett	1	0.583072	0.124723	19.9742	had a little color developing
Bartlett	2	0.514854	0.12145	19.2924	had a little color developing
Bartlett	3	0.666988	0.032572	18.7165	had lots of color on the lower canopy
Bartlett	5	0.510762	0.0148375	18.7029	had a little color developing
Harvard	1	0.685636	0.00821116	19.1203	green leaves
Harvard	2	0.67834	0.031507	19.5529	green leaves
Harvard	4	0.71281	5.98101e-05	17.8907	green leaves
Harvard	5		0.399215	20.7626	green leaves
Bartlett	4		0.127621	20.7056	had a little color developing, also had black spots on the leaves, some sign of a pest or disease
Harvard	3		0.0140075	20.0185	green leaves

## Sheet: Panama 2012
Tree I.D	plot	Treatment	chamber height	volume	duration (hours)	DBH	[O2] Hamp	std	ARQ	std
5256	17	NPK	127	0	47.1167	19.4169	18.1444		0.588356
2565	5	NPK	141	89	45.9	35.6507	16.9737	0.0744949	0.612319	0.016586
4761	20	NPK	150	91	45.9833	22.6	17.8367	0.0916062	0.602428	0.0799907
2788	12	C	129	79	47.6	36.2873	20.2002	0.513505	0.588423	0.037374
2226	6	C	138	0	46.0833	50.293	20.0075	0.109682	0.535614	0.10493
3926	36	C	133	109	24.7167	33.7408	18.5272	0.36189	0.49359	0.0133599
5937	26	C	124.5	0	22.0667	0	18.4591	0.095999	0.538636	0.0331171
5148	14	P	129	95	46.45	25.1465	13.9241	0.294965	0.457209	0.0259585
4208	1	P	152	85	45.9667	19.8944	14.9569	0.037448	0.555954	0.00699858
2863	24	P	120	100	45.9167	39.1521	20.3965	0.079072	0.537854	0.0660237
12_35	12	L-	146	150	23.5833	0	18.8347	0.138808	0.723785	0.0281808
13_40	13	L-	119	133	23.0833	0	18.083	0.0103587	0.466477	0.0405393

## Sheet: Panama 2013
flask	Tree I.D	Plot Num.	Block	Treatment	Perimeter in the lower side of the chamber	Height from the lower part of the chamber to the ground	volume	Tstart	Tend	Measurement	Incubation time (hr)	notices 1	notices 2	CO2 flask (%)	O2 flask (%)	ARQ	Tree I.D	Treatment	litter	N	P	K	Treatment	diameter in the lower side of the chamber	cahmber volume	cahmber height	plot	sstate duration (hours)	ARQ short	ARQ steady state							ARQ incubation 1				O2(%) incubation Hampadah		Dry weight core (g)	Incubation duration (h)	Incubation volume (cm3)	resp rate	resp rate nanomole gFW s	ARQ incubation 2
490	8_47, 40957	8	1	L-	67	112	155	2013-09-28 09:11:00	2013-09-28 09:41:00	ARQ	0.5	no leaking		0.121858	20.7902	0.512205	8_47, 40957	1	0	0	0	0	L-	21.3268	112	155	8	53.5833	0.608097	0.423046									7.83333		19.8498	8_47, 40957	0.388967	7.83333	25.4135	2.54906e-05	1.02497	0.384309
491	8_47, 40957	8	1	L-	67	112	155	2013-09-28 09:11:00	2013-09-28 09:41:00	ARQ	0.5	no leaking		0.157012	20.7838	0.703988	13_40	2	0	0	0	0	L-	12.7642	140	130	13	49.55	0.278523	0.391186									7.83333		19.3689	13_40	0.391617	7.83333	25.1735	3.60416e-05	1.44923	0.470982
493	8_47, 40957	8	1	L-	67	112	155	2013-09-28 09:11:00	2013-09-30 15:20:00	ARQ	54.15	no leaking		5.15953	11.7528	0.423046	12634	1	0	0	0	0	L-	42.9718	125	125	4	47.25	0.560174	0.400856									7.83333		17.7502	12634	0.370947	7.83333	15.8694	4.85418e-05	1.95186	0.315974
	8_47, 40957	8	1	L-	67	112	155	2013-09-28 09:11:00	2013-09-30 15:20:00	ARQ	54.15	no leaking					12157	1	0	0	0	0	L-	32.2766	135	131.9	6	48		0.36944							0.340719	4.95	7.83333	20.0872	19.3698	12157	0.18913	7.83333	21.8682	2.94156e-05	1.1828	0.303438
343	8_47, 40957	8	1	L-	67	112	155	2013-09-28 09:45:00	2013-09-30 15:20:00	MS	53.5833	no leaking			#REF!		5937	3	1	0	0	0	C	22.8228	140	118.5	26	44.8167	0.236279	0.387114							0.252085	5	7.83333	20.0017	19.747	5937	0.201188	7.83333	21.6768	9.72852e-06	0.391182	0.21954
309	8_47, 40957	8	1	L-	67	112	155	2013-09-28 09:45:00	2013-09-30 15:20:00	MS	53.5833	no leaking			#REF!		13932	2	1	0	0	0	C	16.0428	125	121	12	44.3167	0.341525	0.315583									7.83333		17.8057	13932	0.244542	7.83333	16.378	7.46768e-05	3.00274	0.329616
402	8_47, 40957	8	1	L-				2013-09-30 15:33:00	2013-09-30 23:23:00	ARQ	7.83333		T incubation	0.462821	19.8498	0.384309	2788	2	1	0	0	0	C	36.2237	140	128.5	12	44.3167	0.329873	0.348748									7.83333		18.5876	2788	0.284292	7.83333	16.0971	4.74339e-05	1.90731	0.31668
82	8_47, 40957	8	1	L-				2013-09-30 15:33:00	2013-09-30 23:23:00	MS	7.83333		T incubation		#REF!		3926	4	1	0	0	0	C	33.0087	180	136.4	36	48.05	0.286981	0.38538
451	13_40	13	2	L-	40.1	140	130	2013-09-28 13:58:00	2013-09-28 14:28:00	ARQ	0.5	no leaking		0.0910204	20.7404	0.243471	3753	3	1	1	1	1	NPK	30.4941	200	125.1	20	53	0.596788	0.419483									7.83333		19.0767	3753	0.456807	7.83333	24.8621	3.6155e-05	1.45378	0.332098
452	13_40	13	2	L-	40.1	140	130	2013-09-28 13:58:00	2013-09-28 14:28:00	ARQ	0.5	no leaking		0.104174	20.7453	0.313574	4518	4	1	1	1	1	NPK	36.3192	175	127.2	29	49.6167	0.256997	0.365948									7.83333		19.1837	4518	0.570227	7.83333	24.2259	2.66103e-05	1.07	0.44125
450	13_40	13	2	L-	40.1	140	130	2013-09-28 13:58:00	2013-09-30 16:02:00	ARQ	50.0667	no leaking		4.8404	11.6306	0.391476	694	2	1	1	1	1	NPK	43.0673	160	128.2	17	48.95	0.496739	0.276284									7.83333		19.0635	694	0.44255	7.83333	15.9375	2.40921e-05	0.968741	0.308246
453	13_40	13	2	L-	40.1	140	130	2013-09-28 13:58:00	2013-09-30 16:02:00	ARQ	50.0667	no leaking		4.93879	11.4255	0.390895	2565	1	1	1	1	1	NPK	34.5366	115	127	5	47.5	0.647507	0.530248							0.240894	4.2	7.83333	20.1627	19.4355	2565	0.193953	7.83333	18.0369	2.39833e-05	0.964365	0.248561
310	13_40	13	2	L-	40.1	140	130	2013-09-28 14:29:00	2013-09-30 16:02:00	MS	49.55	no leaking			#REF!		1381	3	1	0	0	1	K	56.9138	180	136	19	52.4333		0.486993
229	13_40	13	2	L-	40.1	140	130	2013-09-28 14:29:00	2013-09-30 16:02:00	MS	49.55	no leaking			#REF!		170	1	1	0	0	1	K	49.4017	140	138	2	47.8		0.366047
400	13_40	13	2	L-	40.1	140		2013-09-30 16:14:00	2013-10-01 00:04:00	ARQ	7.83333	no leaking	T incubation	0.784691	19.3689	0.470982	4274	1	1	0	0	1	K	18.08	145	132	2	47.9833		0.290938									conversion factor ml-nanomol			40209.8
228	13_40	13	2	L-	40.1	140		2013-09-30 16:14:00	2013-10-01 00:04:00	MS	7.83333	no leaking	T incubation		#REF!		161	1	1	0	0	1	K	30.9079	145	131.4	2	47.9833		0.45001
407	12634	4	1	L-	135	129.6	125	2013-10-03 10:44:00	2013-10-03 11:14:00	ARQ	0.5	no leaking		0.253019	20.5697	0.560174	928	3	1	0	1	1	PK	50.3885	175	144.5	21	52.0167		0.297421
408	12634	4	1	L-	135	129.6	125	2013-10-03 10:44:00	2013-10-05 09:59:00	ARQ	47.25	no leaking		8.47662	4.74624	0.3957	8237	4	1	0	1	1	PK	27.4383	165	118	33	48.85		0.406067
409	12634	4	1	L-	135	129.6	125	2013-10-03 10:44:00	2013-10-05 09:59:00	ARQ	47.25	no leaking		8.15727	5.75557	0.406012	5075	1	1	0	1	1	PK	17.0614	120	128.5	7	48.4833		0.343625
19+46	12634	4	1	L-	135	129.6	125	2013-10-03 10:44:00	2013-10-05 09:59:00	MS	47.25	no leaking			#REF!		4475	2	1	0	1	1	PK	16.6476	130	126.6	13	49.2167		0.532115
247	12634	4	1	L-		130		2013-10-05 10:13:00	2013-10-05 18:03:00	ARQ	7.83333	no leaking	T incubation	1.05104	17.7502	0.315974	5806	3	1	1	0	1	NK	21.3268	160	122.5	27	44.4333		0.436361
253	12634	4	1	L-		130		2013-10-05 10:13:00	2013-10-05 18:03:00	MS	7.83333	no leaking	T incubation		#REF!		3614	4	1	1	0	1	NK	39.8842	200	128.4	34	47.25		0.555843
410	12157	6	1	L-	101.4	131.9	135	2013-10-03 10:18:00	2013-10-05 10:18:00	ARQ	48	no leaking		6.06431	8.5929	0.370514	2238	2	1	1	0	1	NK	22.2499	130	129.1	10	48.9167		0.507432
412	12157	6	1	L-	101.4	131.9	135	2013-10-03 10:18:00	2013-10-05 10:18:00	ARQ	48	no leaking		6.04605	8.55856	0.368367	2236	2	1	1	0	1	NK	22.2499	120	123.7	10	49.0333		0.459305
73	12157	6	1	L-		130		2013-10-05 10:35:00	2013-10-05 15:32:00	ARQ	4.95	no leaking	T incubation	0.333971	20.0872	0.340719	10408	4	1	0	1	0	P	12.6369	150	124.3	30	46.0667		0.359997
250	12157	6	1	L-		130		2013-10-05 10:35:00	2013-10-05 18:25:00	ARQ	7.83333	no leaking	T incubation	0.551664	19.3698	0.303438	2863	3	1	0	1	0	P	38.1972	180	144.4	24	51.0833		0.430824
302	12157	6	1	L-		130		2013-10-05 10:35:00	2013-10-05 18:25:00	MS	7.83333	no leaking	T incubation		#REF!		1885	2	1	0	1	0	P	34.9504	160	130	14	49.05		0.401554
454	5937	26	3	C	71.7	118.5	140	2013-09-28 13:05:00	2013-09-28 13:37:00	ARQ	0.533333	no leaking		0.0852535	20.7506	0.226903	5148	2	1	0	1	0	P	24.7645	75	135.3	14	49.1		0.286976
455	5937	26	3	C	71.7	118.5	140	2013-09-28 13:05:00	2013-09-28 13:37:00	ARQ	0.533333	no leaking		0.0800471	20.787	0.245655	5662	3	1	1	1	0	NP	18.5893	140	130.1	22	44.9333		0.341759
456	5937	26	3	C	71.7	118.5	140	2013-09-28 13:05:00	2013-09-30 10:29:00	ARQ	45.4	no leaking		5.11183	11.0344	0.388741	3862	4	1	1	1	0	NP	36.3828	160	130.5	35	48.3833		0.492443
457	5937	26	3	C	71.7	118.5	140	2013-09-28 13:05:00	2013-09-30 10:29:00	ARQ	45.4	no leaking		4.98808	11.1947	0.385487	5024	1	1	1	1	0	NP	18.9394	130	130.5	3	48.2667		0.47827
38	5937	26	3	C	71.7	118.5	140	2013-09-28 13:40:00	2013-09-30 10:29:00	MS	44.8167	no leaking			#REF!		5021	1	1	1	1	0	NP	25.3693	160	123.5	3	48.3833		0.360835
84	5937	26	3	C	71.7	118.5	140	2013-09-28 13:40:00	2013-09-30 10:29:00	MS	44.8167	no leaking			#REF!		4926	3	1	1	0	0	N	27.9794	170	133.1	23	51.4667		0.410529
115	5937	26	3	C	71.7	118.5	140	2013-09-30 10:50:00	2013-09-30 15:50:00	ARQ	5		T incubation	0.279062	20.0017	0.252085	3471	4	1	1	0	0	N	39.2794	190	130	28	50.65		0.379866
255	5937	26	3	C	71.7	118.5	140	2013-09-30 10:50:00	2013-09-30 18:40:00	ARQ	7.83333		T incubation	0.334962	19.747	0.21954	189	1	1	1	0	0	N	66.8451	180	135	4	46.7667		0.359471
1104	5937	26	3	C	71.7	118.5	140	2013-09-30 10:50:00	2013-09-30 18:40:00	MS	7.83333		T incubation		#REF!		1766	2	1	1	0	0	N	25.2738	120	130.7	11	49.1333		0.332345
435	13932	12	2	C	50.4	121	125	2013-10-03 12:02:00	2013-10-03 12:34:00	ARQ	0.533333	no leaking		0.128761	20.6901	0.341525
436	13932	12	2	C	50.4	121	125	2013-10-03 12:02:00	2013-10-05 08:54:00	ARQ	44.8667	no leaking		4.98404	9.04807	0.315703
437	13932	12	2	C	50.4	121	125	2013-10-03 12:02:00	2013-10-05 08:54:00	ARQ	44.8667	no leaking		5.13596	8.67304	0.315463
3	13932	12	2	C	50.4	121	125	2013-10-03 12:35:00	2013-10-05 08:54:00	MS	44.3167	no leaking			#REF!
308	13932	12	2	C	50.4	121	125	2013-10-03 12:35:00	2013-10-05 08:54:00	MS	44.3167	no leaking			#REF!
100	13932	12	2	C		130		2013-10-05 09:05:00	2013-10-05 16:55:00	ARQ	7.83333	no leaking	T incubation	1.07642	17.8057	0.329616
225	13932	12	2	C		130		2013-10-05 09:05:00	2013-10-05 16:55:00	MS	7.83333	no leaking	T incubation		#REF!
438	2788	12	2	C	113.8	128.5	140	2013-10-03 12:10:00	2013-10-03 12:40:00	ARQ	0.5	no leaking		0.11426	20.7249	0.329873
439	2788	12	2	C	113.8	128.5	140	2013-10-03 12:10:00	2013-10-05 08:29:00	ARQ	44.3167	no leaking		5.84067	8.42978	0.352111
440	2788	12	2	C	113.8	128.5	140	2013-10-03 12:10:00	2013-10-05 08:29:00	ARQ	44.3167	no leaking		5.66385	8.57504	0.345385
32	2788	12	2	C	113.8	128.5	140	2013-10-03 12:10:00	2013-10-05 08:29:00	MS	44.3167	no leaking			#REF!
315	2788	12	2	C	113.8	128.5	140	2013-10-03 12:10:00	2013-10-05 08:29:00	MS	44.3167	no leaking			#REF!
15	2788	12	2	C		130		2013-10-05 08:50:00	2013-10-05 16:40:00	ARQ	7.83333	no leaking	T incubation	0.788129	18.5876	0.31668
322	2788	12	2	C		130		2013-10-05 08:50:00	2013-10-05 16:40:00	MS	7.83333	no leaking	T incubation		#REF!
467	3926	36	4	C	103.7	136.4	180	2013-09-28 11:11:00	2013-09-28 11:41:00	ARQ	0.5	no leaking	half tree sick with no leaves in canopy in this side. The chamber was in the sick side.	0.110781	20.7525	0.358296
476	3926	36	4	C	103.7	136.4	180	2013-09-28 11:11:00	2013-09-28 11:41:00	ARQ	0.5	no leaking		0.0870076	20.732	0.215666
477	3926	36	4	C	103.7	136.4	180	2013-09-28 11:11:00	2013-09-30 11:46:00	ARQ	48.5833	no leaking		4.40483	12.4431	0.38995
466	3926	36	4	C	103.7	136.4	180	2013-09-28 11:11:00	2013-09-30 11:46:00	ARQ	48.5833	no leaking		4.27202	12.504	0.380811
26	3926	36	4	C	103.7	136.4	180	2013-09-28 11:43:00	2013-09-30 11:46:00	MS	48.05	no leaking			#REF!
234	3926	36	4	C	103.7	136.4	180	2013-09-28 11:43:00	2013-09-30 11:46:00	MS	48.05	no leaking			#REF!
494	3753	20	3	NPK	95.8	125.1	200	2013-09-28 09:26:00	2013-09-28 09:58:00	ARQ	0.533333	no leaking		0.209863	20.649	0.564361
495	3753	20	3	NPK	95.8	125.1	200	2013-09-28 09:26:00	2013-09-28 09:58:00	ARQ	0.533333	no leaking		0.275945	20.575	0.629216
485	3753	20	3	NPK	95.8	125.1	200	2013-09-28 09:26:00	2013-09-30 15:00:00	ARQ	53.5667	no leaking		7.04833	8.33197	0.42212
484	3753	20	3	NPK	95.8	125.1	200	2013-09-28 09:26:00	2013-09-30 15:00:00	ARQ	53.5667	no leaking		6.93973	8.37029	0.416846
325+113	3753	20	3	NPK	95.8	125.1	200	2013-09-28 10:00:00	2013-09-30 15:00:00	MS	53	no leaking			#REF!
403	3753	20	3	NPK				2013-09-30 15:13:00	2013-09-30 23:03:00	ARQ	7.83333		T incubation	0.662127	19.0767	0.332098
473	4518	29	4	NPK	114.1	127.2	175	2013-09-28 11:00:00	2013-09-28 11:31:00	ARQ	0.516667	no leaking		0.0907908	20.7784	0.296038
472	4518	29	4	NPK	114.1	127.2	175	2013-09-28 11:00:00	2013-09-28 11:31:00	ARQ	0.516667	no leaking		0.0807381	20.7631	0.217956
475	4518	29	4	NPK	114.1	127.2	175	2013-09-28 11:00:00	2013-09-30 13:09:00	ARQ	50.15	no leaking		4.48183	11.6822	0.36425
474	4518	29	4	NPK	114.1	127.2	175	2013-09-28 11:00:00	2013-09-30 13:09:00	ARQ	50.15	no leaking		4.49799	11.7344	0.367647
48	4518	29	4	NPK	114.1	127.2	175	2013-09-28 11:32:00	2013-09-30 13:09:00	MS	49.6167	no leaking			#REF!
327	4518	29	4	NPK	114.1	127.2	175	2013-09-28 11:32:00	2013-09-30 13:09:00	MS	49.6167	no leaking			#REF!
401	4518	29	4	NPK				2013-09-30 13:26:00	2013-09-30 21:16:00	ARQ	7.83333		T incubation	0.819384	19.1837	0.44125
259	4518	29	4	NPK				2013-09-30 13:26:00	2013-09-30 21:16:00	MS	7.83333		T incubation		#REF!
441	694	17	2	NPK	135.3	128.2	160	2013-10-03 12:18:00	2013-10-03 12:49:00	ARQ	0.516667	no leaking	in the 30 minutes incubation the chamber was not coveredd	0.155887	20.7167	0.496739
442	694	17	2	NPK	135.3	128.2	160	2013-10-03 12:18:00	2013-10-05 13:47:00	ARQ	49.4833	no leaking		5.70602	5.33128	0.275706
443	694	17	2	NPK	135.3	128.2	160	2013-10-03 12:18:00	2013-10-05 13:47:00	ARQ	49.4833	no leaking		5.60519	5.67329	0.276862
254+349	694	17	2	NPK	135.3	128.2	160	2013-10-03 12:50:00	2013-10-05 13:47:00	MS	48.95	no leaking			#REF!
219	694	17	2	NPK		130		2013-10-05 14:01:00	2013-10-05 21:51:00	ARQ	7.83333	no leaking	T incubation	0.621521	19.0635	0.308246
404	2565	5	1	NPK	108.5	127	115	2013-10-03 10:05:00	2013-10-03 10:35:00	ARQ	0.5	no leaking		0.29278	20.5596	0.647507
405	2565	5	1	NPK	108.5	127	115	2013-10-03 10:05:00	2013-10-05 09:35:00	ARQ	47.5	no leaking		7.19011	10.6948	0.529886
406	2565	5	1	NPK	108.5	127	115	2013-10-03 10:05:00	2013-10-05 09:35:00	ARQ	47.5	no leaking		6.96028	11.038	0.53061
340	2565	5	1	NPK	108.5	127	115	2013-10-03 10:05:00	2013-10-05 09:35:00	MS	47.5	no leaking			#REF!
2	2565	5	1	NPK	108.5	127	115	2013-10-03 10:05:00	2013-10-05 09:35:00	MS	47.5	no leaking			#REF!
303	2565	5	1	NPK		130		2013-10-05 09:50:00	2013-10-05 14:02:00	ARQ	4.2	no leaking	T incubation	0.229646	20.1627	0.240894
227	2565	5	1	NPK		130		2013-10-05 09:50:00	2013-10-05 17:40:00	ARQ	7.83333	no leaking	T incubation	0.410417	19.4355	0.248561
486	1381	19	3	K	178.8	136	180	2013-09-28 10:13:00	2013-09-30 14:39:00	ARQ	52.4333	few drops	half tree sick. Leaves in all canopy, chamber in healthy side.	7.22471	9.73723	0.486979
487	1381	19	3	K	178.8	136	180	2013-09-28 10:13:00	2013-09-30 14:39:00	ARQ	52.4333	few drops		7.36276	9.52246	0.487007
243	1381	19	3	K	178.8	136	180	2013-09-28 10:13:00	2013-09-30 14:39:00	MS	52.4333	few drops			#REF!
358	1381	19	3	K	178.8	136	180	2013-09-28 10:13:00	2013-09-30 14:39:00	MS	52.4333	few drops			#REF!
416	170	2	1	K	155.2	138	140	2013-10-03 10:57:00	2013-10-05 10:45:00	ARQ	47.8	no leaking		7.78026	4.87941	0.366047
85+103	170	2	1	K	155.2	138	140	2013-10-03 10:57:00	2013-10-05 10:45:00	MS	47.8	no leaking			#REF!
417	4274	2	1	K	56.8	132	145	2013-10-03 11:04:00	2013-10-05 11:00:00	ARQ	47.9333	no leaking		4.54842	9.21994	0.292104
418	4274	2	1	K	56.8	132	145	2013-10-03 11:04:00	2013-10-05 11:00:00	ARQ	47.9333	no leaking		4.16091	10.1419	0.289773
419	161	2	1	K	97.1	131.4	145	2013-10-03 11:12:00	2013-10-05 11:11:00	ARQ	47.9833	no leaking		6.92093	9.32915	0.45001
7	161	2	1	K	97.1	131.4	145	2013-10-03 11:12:00	2013-10-05 11:11:00	MS	47.9833	no leaking			#REF!
489	928	21	3	PK	158.3	144.5	175	2013-09-28 10:23:00	2013-09-30 14:24:00	ARQ	52.0167	no leaking		4.45954	9.74935	0.29988
488	928	21	3	PK	158.3	144.5	175	2013-09-28 10:23:00	2013-09-30 14:24:00	ARQ	52.0167	no leaking		4.36701	9.80102	0.294962
311	928	21	3	PK	158.3	144.5	175	2013-09-28 10:23:00	2013-09-30 14:24:00	MS	52.0167	no leaking			#REF!
324	928	21	3	PK	158.3	144.5	175	2013-09-28 10:23:00	2013-09-30 14:24:00	MS	52.0167	no leaking			#REF!
465	8237	33	4	PK	86.2	118	165	2013-09-28 12:01:00	2013-09-30 12:52:00	ARQ	48.85	no leaking		5.31911	11.0978	0.407231
464	8237	33	4	PK	86.2	118	165	2013-09-28 12:01:00	2013-09-30 12:52:00	ARQ	48.85	no leaking		5.25901	11.1539	0.404902
319	8237	33	4	PK	86.2	118	165	2013-09-28 12:01:00	2013-09-30 12:52:00	MS	48.85	no leaking			#REF!
425	5075	7	1	PK	53.6	128.5	120	2013-10-03 11:24:00	2013-10-05 11:53:00	ARQ	48.4833	no leaking		6.20327	7.44235	0.346773
426	5075	7	1	PK	53.6	128.5	120	2013-10-03 11:24:00	2013-10-05 11:53:00	ARQ	48.4833	no leaking		5.81665	8.05563	0.340478
34+65	5075	7	1	PK	53.6	128.5	120	2013-10-03 11:24:00	2013-10-05 11:53:00	MS	48.4833	no leaking			#REF!
433	4475	13	2	PK	52.3	126.6	130	2013-10-03 11:53:00	2013-10-05 13:06:00	ARQ	49.2167	few drops		4.31095	14.8092	0.528582
434	4475	13	2	PK	52.3	126.6	130	2013-10-03 11:53:00	2013-10-05 13:06:00	ARQ	49.2167	few drops		4.40955	14.7503	0.535648
29	4475	13	2	PK	52.3	126.6	130	2013-10-03 11:53:00	2013-10-05 13:06:00	MS	49.2167	few drops			#REF!
216	4475	13	2	PK	52.3	126.6	130	2013-10-03 11:53:00	2013-10-05 13:06:00	MS	49.2167	few drops			#REF!
449	5806	27	3	NK	67	122.5	160	2013-09-28 13:21:00	2013-09-30 09:47:00	ARQ	44.4333	no leaking		7.14205	8.69	0.440258
448	5806	27	3	NK	67	122.5	160	2013-09-28 13:21:00	2013-09-30 09:47:00	ARQ	44.4333	no leaking		6.87736	8.93421	0.432464
314	5806	27	3	NK	67	122.5	160	2013-09-28 13:21:00	2013-09-30 09:47:00	MS	44.4333	no leaking			#REF!
463	3614	34	4	NK	125.3	128.4	200	2013-09-28 12:13:00	2013-09-30 11:28:00	ARQ	47.25	no leaking		1.30637	19.243	0.563825
462	3614	34	4	NK	125.3	128.4	200	2013-09-28 12:13:00	2013-09-30 11:28:00	ARQ	47.25	no leaking		1.29887	19.2037	0.547862
101	3614	34	4	NK	125.3	128.4	200	2013-09-28 12:13:00	2013-09-30 11:28:00	MS	47.25	no leaking			#REF!
251	3614	34	4	NK	125.3	128.4	200	2013-09-28 12:13:00	2013-09-30 11:28:00	MS	47.25	no leaking			#REF!
427	2238	10	2	NK	69.9	129.1	130	2013-10-03 11:33:00	2013-10-05 12:28:00	ARQ	48.9167	few drops		4.92422	13.6438	0.508065
428	2238	10	2	NK	69.9	129.1	130	2013-10-03 11:33:00	2013-10-05 12:28:00	ARQ	48.9167	few drops		4.87134	13.7049	0.5068
345	2238	10	2	NK	69.9	129.1	130	2013-10-03 11:33:00	2013-10-05 12:28:00	MS	48.9167	few drops			#REF!
429	2236	10	2	NK	69.9	123.7	120	2013-10-03 11:37:00	2013-10-05 12:39:00	ARQ	49.0333	no leaking		6.87792	9.76332	0.464554
430	2236	10	2	NK	69.9	123.7	120	2013-10-03 11:37:00	2013-10-05 12:39:00	ARQ	49.0333	no leaking		6.62589	9.92655	0.454057
44	2236	10	2	NK	69.9	123.7	120	2013-10-03 11:37:00	2013-10-05 12:39:00	MS	49.0333	no leaking			#REF!
461	10408	30	4	P	39.7	124.3	150	2013-09-28 12:57:00	2013-09-30 11:01:00	ARQ	46.0667	no leaking		5.06331	10.3731	0.360948
460	10408	30	4	P	39.7	124.3	150	2013-09-28 12:57:00	2013-09-30 11:01:00	ARQ	46.0667	no leaking		5.09176	10.2569	0.359047
226	10408	30	4	P	39.7	124.3	150	2013-09-28 12:57:00	2013-09-30 11:01:00	MS	46.0667	no leaking			#REF!
359	10408	30	4	P	39.7	124.3	150	2013-09-28 12:57:00	2013-09-30 11:01:00	MS	46.0667	no leaking			#REF!
481	2863	24	3	P	120	144.4	180	2013-09-28 10:41:00	2013-09-30 13:46:00	ARQ	51.0833	no leaking		5.59636	11.1969	0.432975
480	2863	24	3	P	120	144.4	180	2013-09-28 10:41:00	2013-09-30 13:46:00	ARQ	51.0833	no leaking		5.47253	11.3186	0.428673
224	2863	24	3	P	120	144.4	180	2013-09-28 10:41:00	2013-09-30 13:46:00	MS	51.0833	no leaking			#REF!
28	2863	24	3	P	120	144.4	180	2013-09-28 10:41:00	2013-09-30 13:46:00	MS	51.0833	no leaking			#REF!
445	1885	14	2	P	109.8	130	160	2013-10-03 12:23:00	2013-10-05 13:26:00	ARQ	49.05	no leaking		6.16198	9.36326	0.401554
109	1885	14	2	P	109.8	130	160	2013-10-03 12:23:00	2013-10-05 13:26:00	MS	49.05	no leaking			#REF!
446	5148	14	2	P	77.8	135.3	75	2013-10-03 12:30:00	2013-10-05 13:36:00	ARQ	49.1	no leaking		5.46703	6.77016	0.290874
447	5148	14	2	P	77.8	135.3	75	2013-10-03 12:30:00	2013-10-05 13:36:00	ARQ	49.1	no leaking		5.26557	6.92053	0.283078
14+312	5148	14	2	P	77.8	135.3	75	2013-10-03 12:30:00	2013-10-05 13:36:00	MS	49.1	no leaking			#REF!
459	5662	22	3	NP	58.4	130.1	140	2013-09-28 13:13:00	2013-09-30 10:09:00	ARQ	44.9333	no leaking		3.93957	12.2739	0.341592
458	5662	22	3	NP	58.4	130.1	140	2013-09-28 13:13:00	2013-09-30 10:09:00	ARQ	44.9333	no leaking		4.03774	12.0642	0.341926
320	5662	22	3	NP	58.4	130.1	140	2013-09-28 13:13:00	2013-09-30 10:09:00	MS	44.9333	no leaking			#REF!
335	5662	22	3	NP	58.4	130.1	140	2013-09-28 13:13:00	2013-09-30 10:09:00	MS	44.9333	no leaking			#REF!
469	3862	35	4	NP	114.3	130.5	160	2013-09-28 11:51:00	2013-09-30 12:14:00	ARQ	48.3833	no leaking		3.7203	15.3375	0.498358
468	3862	35	4	NP	114.3	130.5	160	2013-09-28 11:51:00	2013-09-30 12:14:00	ARQ	48.3833	no leaking		3.75736	15.1431	0.486527
470	3862	35	4	NP	114.3	130.5	160	2013-09-28 11:51:00	2013-09-30 12:14:00	MS	48.3833	no leaking			#REF!
471	3862	35	4	NP	114.3	130.5	160	2013-09-28 11:51:00	2013-09-30 12:14:00	MS	48.3833	no leaking			#REF!
421	5024	3	1	NP	59.5	130.5	130	2013-10-03 11:15:00	2013-10-05 11:31:00	ARQ	48.2667	no leaking		5.39487	12.4311	0.477727
422	5024	3	1	NP	59.5	130.5	130	2013-10-03 11:15:00	2013-10-05 11:31:00	ARQ	48.2667	no leaking		5.37122	12.488	0.478812
88	5024	3	1	NP	59.5	130.5	130	2013-10-03 11:15:00	2013-10-05 11:31:00	MS	48.2667	no leaking			#REF!
104	5024	3	1	NP	59.5	130.5	130	2013-10-03 11:15:00	2013-10-05 11:31:00	MS	48.2667	no leaking			#REF!
423	5021	3	1	NP	79.7	123.5	160	2013-10-03 11:19:00	2013-10-05 11:42:00	ARQ	48.3833	few drops		5.35429	9.87087	0.364547
424	5021	3	1	NP	79.7	123.5	160	2013-10-03 11:19:00	2013-10-05 11:42:00	ARQ	48.3833	few drops		5.16315	10.0474	0.357124
95	5021	3	1	NP	79.7	123.5	160	2013-10-03 11:19:00	2013-10-05 11:42:00	MS	48.3833	few drops			#REF!
479	4926	23	3	N	87.9	133.1	170	2013-09-28 10:33:00	2013-09-30 14:01:00	ARQ	51.4667	no leaking		3.9051	13.7933	0.41045
478	4926	23	3	N	87.9	133.1	170	2013-09-28 10:33:00	2013-09-30 14:01:00	ARQ	51.4667	no leaking		3.89906	13.8072	0.410608
346	4926	23	3	N	87.9	133.1	170	2013-09-28 10:33:00	2013-09-30 14:01:00	MS	51.4667	no leaking			#REF!
218	4926	23	3	N	87.9	133.1	170	2013-09-28 10:33:00	2013-09-30 14:01:00	MS	51.4667	no leaking			#REF!
483	3471	28	4	N	123.4	130	190	2013-09-28 10:51:00	2013-09-30 13:30:00	ARQ	50.65	no leaking		7.63901	5.75441	0.380061
482	3471	28	4	N	123.4	130	190	2013-09-28 10:51:00	2013-09-30 13:30:00	ARQ	50.65	no leaking		7.63856	5.73971	0.379671
23+124	3471	28	4	N	123.4	130	190	2013-09-28 10:51:00	2013-09-30 13:30:00	MS	50.65	no leaking			#REF!
413	189	4	1	N	210	135	180	2013-10-03 10:30:00	2013-10-05 09:16:00	ARQ	46.7667	no leaking		6.52229	7.27192	0.360177
414	189	4	1	N	210	135	180	2013-10-03 10:30:00	2013-10-05 09:16:00	ARQ	46.7667	no leaking		6.50506	7.25454	0.358765
72+47	189	4	1	N	210	135	180	2013-10-03 10:30:00	2013-10-05 09:16:00	MS	46.7667	no leaking			#REF!
431	1766	11	2	N	79.4	130.7	120	2013-10-03 11:44:00	2013-10-05 12:52:00	ARQ	49.1333	no leaking		5.57158	8.14134	0.328215
432	1766	11	2	N	79.4	130.7	120	2013-10-03 11:44:00	2013-10-05 12:52:00	ARQ	49.1333	no leaking		5.78381	7.97638	0.336475

## Sheet: Panama 2014
flask	Tree I.D	Plot Num.	Block	Treatment	Perimeter in the lower side of the chamber	Height from the lower part of the chamber to the ground	volume	Tstart	Tend	Measurement	Incubation time (hr)	notices 1	notices 2	CO2 flask (%)	O2 flask (%)	DCO2/DO2	ARQ			Tree I.D	block	Treatment	Perimeter in the lower side of the chamber	Diameter	volume	t1 (start-first)	t1 (start-steady state)	hours t1 (start-steady state)	ARQ short	STD	ARQ steady state	STD
404	2788	12	2	C	113.5	146	115	2014-03-28 11:04:00	2014-03-28 13:05:00	ARQ		no drops, sealed		0.459855	20.2116	0.568595				2788	2	C	113.5	36.1282	115	7260	425700	118.25	0.581262	0.0179142	0.278383	0.000610296
405	2788	12	2	C	113.5	146	115	2014-03-28 11:04:00	2014-03-28 13:05:00	ARQ		no drops, sealed		0.488535	20.1948	0.593929				13932	2	C	50.5	16.0746	122	7260	427440	118.733	0.630199	0.00368995	0.295985	0.00202368
406	2788	12	2	C	113.5	146	115	2014-03-28 11:04:00	2014-04-02 09:48:00	ARQ		no drops, sealed		4.2559	9.45818	0.366861	0.278814			5937	3	C	71.5	22.7592	65	7260	432120	120.033	0.776278	0.0044035	0.292653	0.00969112
407	2788	12	2	C	113.5	146	115	2014-03-28 11:04:00	2014-04-02 09:48:00	ARQ		no drops, sealed		4.23113	9.49024	0.365725	0.277951			5571	4	C	74.5	23.7141	89	7260	431280	119.8	0.738906	0.00228334	0.273651
301	2788	12	2	C	113.5	146	115	2014-03-28 11:07:00	2014-04-02 09:48:00	MS		no drops, sealed		#N/A	#N/A	#N/A
302	2788	12	2	C	113.5	146	115	2014-03-28 11:07:00	2014-04-02 09:48:00	MS		no drops, sealed		#N/A	#N/A	#N/A
400	13932	12	2	C	50.5	136	122	2014-03-28 11:54:00	2014-03-28 13:55:00	ARQ		no drops, sealed		0.931072	19.5419	0.632808
401	13932	12	2	C	50.5	136	122	2014-03-28 11:54:00	2014-03-28 13:55:00	ARQ		no drops, sealed		0.915268	19.5554	0.62759
402	13932	12	2	C	50.5	136	122	2014-03-28 11:54:00	2014-04-02 10:09:00	ARQ		no drops, sealed		5.4927	6.88109	0.387571	0.294554
403	13932	12	2	C	50.5	136	122	2014-03-28 11:54:00	2014-04-02 10:09:00	ARQ		no drops, sealed		5.56484	6.83213	0.391337	0.297416
303	13932	12	2	C	50.5	136	122	2014-03-28 11:58:00	2014-04-02 10:09:00	MS		no drops, sealed		#N/A	#N/A	#N/A
304	13932	12	2	C	50.5	136	122	2014-03-28 11:58:00	2014-04-02 10:09:00	MS		no drops, sealed		#N/A	#N/A	#N/A
408	5937	26	3	C	71.5	135	65	2014-03-28 08:35:00	2014-03-28 10:36:00	ARQ		no drops, sealed		0.715639	20.0831	0.779391
409	5937	26	3	C	71.5	135	65	2014-03-28 08:35:00	2014-03-28 10:36:00	ARQ		no drops, sealed		0.793739	19.9751	0.773164
410	5937	26	3	C	71.5	135	65	2014-03-28 08:35:00	2014-04-02 08:37:00	ARQ		no drops, sealed		4.80491	8.859	0.394087	0.299506
411	5937	26	3	C	71.5	135	65	2014-03-28 08:35:00	2014-04-02 08:37:00	ARQ		no drops, sealed		4.56664	8.91277	0.376054	0.285801
306	5937	26	3	C	71.5	135	65	2014-03-28 10:39:00	2014-04-02 08:37:00	MS		no drops, sealed		#N/A	#N/A	#N/A
307	5937	26	3	C	71.5	135	65	2014-03-28 10:39:00	2014-04-02 08:37:00	MS		no drops, sealed		#N/A	#N/A	#N/A
412	5571	36	4	C	74.5	133.5	89	2014-03-28 09:22:00	2014-03-28 11:23:00	ARQ		no drops, sealed		0.845704	19.862	0.740521
413	5571	36	4	C	74.5	133.5	89	2014-03-28 09:22:00	2014-03-28 11:23:00	ARQ		no drops, sealed		0.856119	19.8431	0.737292
414	5571	36	4	C	74.5	133.5	89	2014-03-28 09:22:00	2014-04-02 09:10:00	ARQ		no drops, sealed		6.24481	3.71763	0.360067	0.273651
415	5571	36	4	C	74.5	133.5	89	2014-03-28 09:22:00	2014-04-02 09:10:00	ARQ		no drops, sealed		#N/A	#N/A	#N/A	#N/A
309	5571	36	4	C	74.5	133.5	89	2014-03-28 11:27:00	2014-04-02 09:10:00	MS		no drops, sealed		#N/A	#N/A	#N/A
311	5571	36	4	C	74.5	133.5	89	2014-03-28 11:27:00	2014-04-02 09:10:00	MS		no drops, sealed		#N/A	#N/A	#N/A

## Sheet: Spain
				Chamber experiment									Stem cores incubation experiment
Tree ID	diameter in the lower part of the chamber	Height from the lower part of the chamber to the ground	volume	short smpl hour	ARQ short	std	steady state smpl hour	ARQ steady state	std	O2 short	CO2 short	O2 steady	ARQ 3 h	ARQ 8 h	O2 3 h	O2 8 h	Set-up volume 3 h incubation	Set-up volume 8 h incubation	Duration 3 h incubation	Duration 8 h incubation	Average daily (15/5 09:00-17:00) sap flow (m3 H2O m-2 h-1)
Main_SAP1	46.3141	130	140	2015-05-15 10:29:00	0.367915		2015-05-18 08:52:00	0.35491	0.00424958	20.5828	0.252432	9.59763	0.232334	0.593431	18.2985	20.1775	38.844	35.0465	03:00:00	05:10:00	23.2843
Main_SAP2	34.6958	106	130	2015-05-15 10:35:00	0.401718	0.010201	2015-05-18 09:01:00	0.348741	0.00358962	20.2264	0.330271	1.71477	0.463434	0.644495	17.3101	18.7843	27.762	23.826	02:58:00	05:02:00	13.0852
Main_SAP5	48.3831	95	140	2015-05-15 10:17:00	0.433664	0.0389132	2015-05-18 08:35:00	0.481867	0.00528811	20.4677	0.249202	13.5995	0.285976	0.66902	17.7119	18.8559	37.774	33.7035	03:04:00	05:22:00
Main_SAP6	43.7676	114	150	2015-05-15 10:22:00	0.534135	0.101407	2015-05-18 08:43:00	0.371093	0.00242423	20.4356	0.309135	8.51194	0.350165	0.534135	18.7629	20.4356	39.83	35.9095	02:58:00	05:13:00	16.8155
North_SAP1 SAP2	47.4282	123	160	2015-05-15 11:27:00	0.412929	0.0649784	2015-05-18 11:39:00	0.366578	0.00299995	19.8133	0.508235	6.25646	0.291719	0.716738	15.2872	17.2316	39.81	35.9745	03:16:00	05:06:00
North_SAP1 SAP3	40.4254	126	140	2015-05-15 11:33:00	0.414733	0.0346649	2015-05-18 12:01:00	0.27291	0.0041616	20.2572	0.327146	5.17309	0.304072	0.502193	17.7058	19.4749	38.946	35.097	03:32:00	05:36:00	17.3817
North_SAP1 SAP4	40.107	123	150	2015-05-15 11:40:00	0.395024	0.0194622	2015-05-18 12:52:00	0.519876	0.00273931	20.2378	0.32156	15.5816	0.274103	0.444524	18.6025	19.7874	39.447	35.5615	03:04:00	05:33:00
North_SAP1 SAP5	48.7014	129	120	2015-05-15 11:47:00	0.429565	0.0177957	2015-05-18 13:44:00	0.329208	0.00123298	20.307	0.316108	8.13098	0.403894	0.66087	17.1763	18.6449	0	0	02:56:00	05:20:00	12.6455
South_SAP2	47.9056	123	150	2015-05-15 13:50:00	0.455699	0.159407	2015-05-18 19:07:00	0.315747	0.00217878	20.3196	0.25757	3.9552	0.347528	0.655021	18.326	19.9272	40.221	36.2685	02:57:00	04:56:00	18.7999
South_SAP3	35.6507	120	130	2015-05-15 13:58:00	0.405323	0.149215	2015-05-18 19:38:00	0.448969	0.00272025	20.4009	0.208063	14.3659	0.421577	0.664356	17.0723	19.2843	31.195	27.2585	03:54:00	05:01:00	15.3172
South_SAP4	44.2451	120	140	2015-05-15 14:11:00	0.421037		2015-05-18 19:56:00	0.415255	0.000486414	20.4666	0.159579	14.7061	0.304095	0.544986	18.2095	19.9241	40.55	36.66	03:34:00	05:00:00	7.15556
South_SAP6	44.2451	128	150	2015-05-15 14:18:00	0.399182	0.0410294	2015-05-18 20:22:00	0.341264		20.2558	0.316595	8.09478	0.200971	0.485329	17.506	20.1091	27.823	23.843	03:43:00	05:01:00	12.5748
B9	47.4282	110	150	2015-05-15 12:43:00	0.448004	0.00489479	2015-05-18 16:46:00	0.402617	0.00176215	20.244	0.356346	10.8404	0.422546	0.578048	18.0344	19.8272	38.22	34.2225	03:00:00	05:00:00
B10	63.662	118	150	2015-05-15 12:51:00	0.421717	0.0643029	2015-05-18 17:22:00	0.356842	0.00447444	20.0934	0.400171	9.78911	0.205475	0.431414	17.0051	19.7462	39.507	35.5305	02:47:00	04:40:00
B11	45.8366	127	160	2015-05-15 12:59:00	0.367265	0.0764464	2015-05-18 17:48:00	0.514446	0.00323167	20.4262	0.233084	17.2673	0.415288	0.630487	18.4658	19.9921	39.464	35.5705	03:47:00	05:03:00
B12	44.5634	120	160	2015-05-15 13:04:00	0.347331	0.000316684	2015-05-18 18:11:00	0.406284	0.00125495	20.3842	0.236516	13.8418	0.366982	0.351453	19.7883	19.9041	27.704	23.786	03:57:00	05:06:00

## Sheet: Brazil
ARQ chambers													In-stem experiment
	dbh (cm)	2012-03-31		2012-10-17		2013-05-01		2013-10-04		2014-03-09			2012-03-31	O2			2012-10-17			2012-03-31	CO2		2012-10-17			2012-03-31	ARQ		2012-10-17
Tower tree (m above ground)	29.7	Chamber	STD	Chamber	STD	Chamber	STD	Chamber\chamber pre gird	STD	Chamber	STD			Instem 4cm	Instem 8cm	Instem 12cm	Instem 4cm	Instem 8cm	Instem 12cm	Instem 4cm	Instem 8cm	Instem 12cm	Instem 4cm	Instem 8cm	Instem 12cm	Instem 4cm	Instem 8cm	Instem 12cm	Instem 4cm	Instem 8cm	Instem 12cm
Tower 0.2m		0.599019	0.161949	1.13073	0.174165	0.668021							0.2	8.77916	13.857	8.23563	12.1615	15.6007	11.5089	8.29453	4.70117	8.08586	2.98115	3.79939	6.25012	0.515449	0.499435	0.48094	0.254341	0.534114	0.499907
Tower 1.8m		0.355083	0.0937549	0.780119	0.00529845	0.487199	0.0196136						1.8	17.882	10.2862	15.4944	6.7731	15.935	12.864	1.77636	6.76762	3.07597	8.83547	2.548	5.3895	0.430135	0.47947	0.422934	0.47151	0.380076	0.502801
Tower 3.5				0.761086									3.5
Tower 6.5m		0.405867	0.134387	0.895107									6.5	12.4021	12.4149	14.7822	13.9492	8.43775	10.5136	6.34053	5.2116	3.43184	5.17879	6.7937	5.70838	0.560183	0.460501	0.417947	0.557863	0.410223	0.412784
Tower 11m		0.517773	0.11257										11	12.323	16.1507	14.7822				5.77706	2.23162	3.43184				0.505411	0.347057	0.417947
Tower 15m
tree 233	57.8		0.171756	0.833671	0.0620832	0.617207	0.0531887	0.727111	0.0196126	0.829773	0.0305227
tree 303	46.6	0.331291	0.0749267		0.304505	0.585292	0.0158045	0.670162	0.0522487	0.819848	0.00442315
tree 355	54	0.292668	0.00997277	0.963453	0.0693158	0.566901	0.00833162	0.587015		0.598776	0.0566387
tree 406	27	0.375255	0.0651521	0.833637	0.000431659	0.4513	0.0104074	0.498609	0.0699954	0.533427	0.00196276
tree 490	30				0.270554	0.445713	0.0114045	0.64029		0.860621	0.0521374
tree 492	31.5	0.626595		0.664899		0.42579	0.00323516	0.607775	0.0706315	0.545688	0.000779324
